# Supplementary material
Source: MDPI journal article supplement (https://www.mdpi.com/2076-3417/9/18/3683)
Supplement: s1 [file s1]

# Investigation on the Performance Improvement of Polyacrylonitrile-Derived Flexible Electrospun Carbon Nanofiber Mats

Xin He<sup>\*1</sup>, Qiuming Lan<sup>1</sup>, Sirou Zhao<sup>1</sup>, Junyan Liu<sup>1</sup>, Chi Zhang<sup>1</sup>, Bohua Chen<sup>1</sup>, Mei Chen<sup>1</sup>,  
Mingxia Song<sup>2</sup>

<sup>1</sup>School of Applied Physics and Materials, Wuyi University, Jiangmen 529020, Guangdong Province, P.R. China;

<sup>2</sup>Collaborative Innovation Center of Atmospheric Environment and Equipment Technology (CICAEET), Jiangsu Key Laboratory of Atmospheric Environment Monitoring and Pollution Control, School of Chemistry and Materials Science, Nanjing University of Information Science & Technology (NUIST), Nanjing 210044, Jiangsu Province, P.R. China.

\*Corresponding author: [hexinwyu@126.com](mailto:hexinwyu@126.com) (X. He)

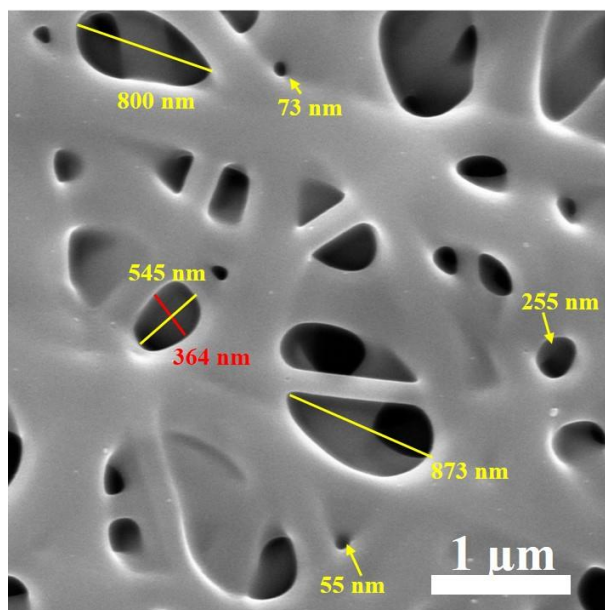

Figure S1 SEM image of PAN-derived carbon nanofiber mats of the sample C-1 with a high magnification.

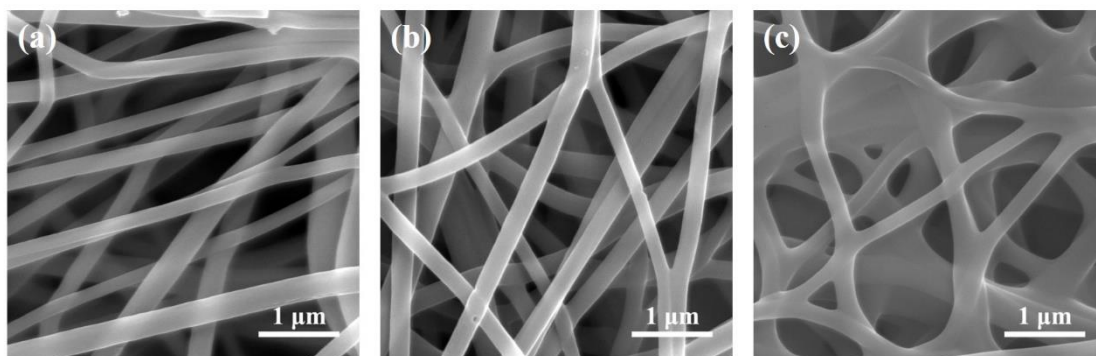

Figure S2 SEM images of PAN-derived carbon nanofiber mats of the sample C-2 (a), C-3 (b) and C-4 (c) with a high magnification.

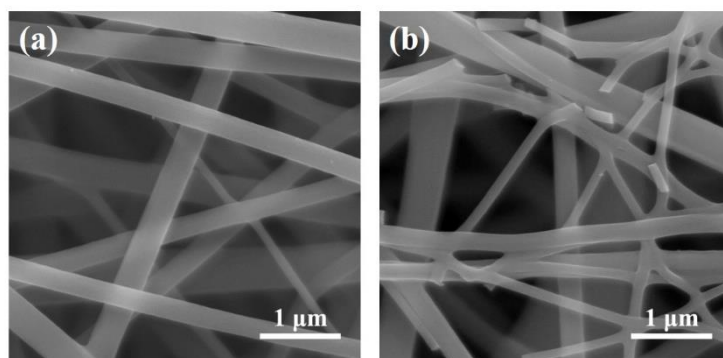

Figure S3 SEM images of PAN-derived carbon nanofiber mats of the sample C-5 (a) and C-6 (b) with a high magnification.
